## PERSPECTIVAS

### NOTA DEL EDITOR

#### 419 Desarrollo de estrategias y terapéutica psicofarmacológicas nuevas

*Ned H. Kalin, M.D.*

### COMENTARIO

#### 422 Un consejo acerca de la esketamina intranasal

*Alan F. Schatzberg, M.D.*

### REVISIÓN Y RESEÑAS

#### 425 De la neurobiología a medicamentos nuevos: Un enfoque fundamentado a la traslación

*Joshua A. Gordon, M.D., Ph.D.*

## NUEVAS INVESTIGACIONES

### ARTÍCULOS

#### 428 Eficacia y seguridad del aerosol nasal de esketamina dosificada de manera flexible, combinado con un antidepresivo oral recién iniciado en la depresión resistente al tratamiento: Un estudio aleatorizado, doble ciego, con controles activos

*Vanina Popova, M.D., et al.* [COMENTARIO](#) • [EMC](#)

Este estudio multicéntrico de fase 3 que apoya la eficacia y la seguridad del aerosol nasal de esketamina como antidepresivo de acción rápida llevó a que la Administración de Alimentos y Medicamentos de los Estados Unidos (FDA) aprobara el uso de la esketamina, en conjunto con un antidepresivo oral, para el tratamiento de la depresión resistente al tratamiento.

#### 439 Tratamiento con cariprazina de la depresión bipolar: Un estudio de fase 3 aleatorizado, doble ciego, controlado con placebo

*Willie Earley, M.D., et al.* [VIDEO](#)

La cariprazina, un nuevo medicamento antipsicótico, fue relativamente seguro y efectivo para reducir los síntomas depresivos en adultos con depresión bipolar tanto en dosis de 1,5 mg/ día como de 3,0 mg/ día, en comparación con el placebo. La cariprazina también tuvo tasas bajas de discontinuación y cambios metabólicos y aumento de peso, sin significancia clínica.

#### 449 Olanzapina versus placebo en pacientes adultos ambulatorios con anorexia nerviosa: Un ensayo clínico aleatorizado

*Evelyn Attia, M.D., et al.* [AUDIO](#) • [VIDEO](#)

La olanzapina, en comparación con el placebo, produjo mayores aumentos del índice de masa corporal en pacientes con anorexia nerviosa, pero otros signos de beneficio clínico no estuvieron tan claros. Estos datos sugieren un efecto terapéutico modesto de la olanzapina en esta afección.

#### 457 Mitigación del aumento de peso inducido por la olanzapina con samidorfan, un antagonista opioide: Un estudio de fase 2 aleatorizado y doble ciego con pacientes con esquizofrenia

*William F. Martin, Ph.D., et al.*

El samidorfan añadido a la olanzapina demostró tener más efectos beneficiosos en relación al aumento de peso en pacientes con esquizofrenia, en comparación con el placebo añadido a la olanzapina. No se observaron diferencias entre los grupos de estudio con relación a los síntomas.

#### 468 Los receptores de nociceptina están hiperregulados en el trastorno por consumo de cocaína: Un estudio de imágenes de tomografía por emisión de positrones utilizando [11C]NOP-1A

*Rajesh Narendran, M.D., et al.* [EMC](#)

Un aumento observado de agonistas de péptidos opioides nociceptivos en humanos que abusan de la cocaína apoya el desarrollo clínico de agonistas de péptidos opioides nociceptivos para tratar los trastornos por consumo de cocaína.

**477 Variantes farmacogenómicas e interacciones de medicamentos identificadas por medio del análisis genético del metabolismo de la clozapina.**

Antonio F. Pardiñas, Ph.D., et al. **EMC**

Cuatro sitios (*loci*) diferenciados del genoma completo contienen variantes comunes que afectan el metabolismo de la clozapina. También se demostraron las características que comparte con el metabolismo de otros compuestos biológicos, como la nicotina o la cafeína.

**COMUNICADOS Y ACTUALIZACIONES**

**487 ¿Cuánto dura típicamente la abstinencia de antidepresivos?**

Michael P. Hengartner, Ph.D., et al.

**487 Abordando retos clínicos de la discontinuación de antidepresivos.**

Giovanni A. Fava, M.D., Fiammetta Cosci, M.D., Ph.D.

**488 Cuando descontinuar los antidepresivos ISRS es un reto: Una respuesta a cartas al editor**

Manish K. Jha, M.D., Madhukar H. Trivedi, M.D.

**490 Libros recibidos**

**OTROS TEMAS DE INTERÉS**

**489 [Corrections to Attia et al. and Kwako et al.]**

**491 Educación Médica Continuada**

**Cubierta:** [This issue of the *Journal* features six research articles that present findings relevant to the development of new pharmacological treatment strategies. Discussions on their merits and limitations by Editor-in-Chief Ned Kalin (p. 419) and Alan Schatzberg (p. 422) and a vision of the future from NIMH Director Joshua Gordon (p. 425) form the cover's word cloud. (Images by Sergey Korkin, Shutterstock.com; and WordArt.com.)]

**AUDIO** Article is highlighted in AJP Audio, a downloadable .mp3 file available at [ajp.psychiatryonline.org](http://ajp.psychiatryonline.org)

**EDITORIALE** Article is discussed in one of the issue's editorials

**EMC** A course covering the content of this article is available online for paid subscribers to the AJP CME Course program

**VIDEO** Article is highlighted online by Deputy Editor Daniel S. Pine, M.D.

**La Tabla de Contenidos y resúmenes de Este Número Está Disponible en Español**  
(Abstracts are also available in Spanish)

Translation presented in collaboration with the Office of Global Health, Rutgers-Robert Wood Johnson Medical School. Support for this effort provided by ACTA Colombia.

**Translation courtesy of**

**Sergi Casals, M.A.**, Garuna, Medellín, Colombia ([www.garunaeditors.com](http://www.garunaeditors.com))

**Carlos López Jaramillo, M.D., M.Sc., Ph.D.**, Universidad de Antioquia, Medellín, Colombia

**Javier I. Escobar, M.D., M.Sc.**, Rutgers-Robert Wood Johnson Medical School

# Eficacia y seguridad del aerosol nasal de esketamina dosificada de manera flexible, combinado con un antidepresivo oral recién iniciado en la depresión resistente al tratamiento: Un estudio aleatorizado, doble ciego, con controles activos

Vanina Popova, M.D., Ella J. Daly, M.D., Madhukar Trivedi, M.D., Kimberly Cooper, M.S., Rosanne Lane, M.A.S., Pilar Lim, Ph.D., Christine Mazzucco, M.Sc., David Hough, M.D., Michael E. Thase, M.D., Richard C. Shelton, M.D., Patricio Molero, M.D., Ph.D., Eduard Vieta, M.D., Ph.D., Malek Bajbouj, M.D., Husseini Manji, M.D., Wayne C. Drevets, M.D., Jaskaran B. Singh, M.D

**Objetivo:** Alrededor de un tercio de los pacientes con depresión no logran alcanzar la remisión a pesar de un tratamiento con múltiples antidepresivos. Este estudio comparó la eficacia y la seguridad del cambio, en pacientes con depresión resistente al tratamiento, de un antidepresivo ineficaz a un aerosol nasal de esketamina dosificado de manera flexible más un antidepresivo recién iniciado, o a un antidepresivo recién iniciado (comparador activo) más aerosol nasal placebo.

**Método:** Este fue un estudio de fase 3, doble ciego, con controles activos y multicéntrico, realizado en 39 centros ambulatorios de referencia. El estudio se realizó con adultos con depresión no psicótica de moderada a severa y un historial de «no respuesta» por lo menos a dos antidepresivos en el episodio en curso, con un antidepresivo evaluado prospectivamente. Después de confirmar que no habían respondido a los antidepresivos, los sujetos de estudio fueron asignados aleatoriamente a un tratamiento con aerosol nasal de esketamina (56 o 84 mg dos veces por semana) y un antidepresivo, o a un tratamiento con antidepresivo y aerosol nasal placebo. La meta primaria de eficacia, el cambio desde el inicio hasta el día 28 en la puntuación de la Escala de Evaluación de la Depresión de Montgomery-Åsberg (MADRS), se evaluó con un modelo de efectos mixtos utilizando medidas repetidas.

**Resultados:** De 435 pacientes examinados, 227 fueron asignados a un tratamiento de manera aleatoria y 197 completaron la fase de tratamiento doble ciego de 28 días. El cambio

en la puntuación MADRAS con esketamina más antidepresivo fue significativamente mayor que con un antidepresivo más placebo en el día 28 (diferencia de medias de mínimos cuadrados = -4,0; SE = 1,69; IC 95% = -7,31; -0,64); igualmente, durante el estudio se observó antes una mejoría clínicamente significativa en el grupo de esketamina más antidepresivo. Los cinco eventos adversos más comunes (disociación, náuseas, vértigo, disgeusia y mareo) se observaron todos con más frecuencia en el grupo de esketamina más antidepresivo que en el grupo de antidepresivo más placebo; 7% y 0,9% de los pacientes en los respectivos grupos de tratamiento descontinuaron el medicamento del estudio debido a un evento adverso. Los eventos adversos en el grupo de esketamina más antidepresivo generalmente aparecían poco después de las dosis y se resolvían después de 1,5 horas.

**Conclusiones:** Las actuales opciones de tratamiento para la depresión resistente al tratamiento tienen limitaciones considerables en términos de eficacia y de aceptabilidad de los pacientes. Se espera que la esketamina responda a una necesidad médica desatendida en esta población a través de su novedoso mecanismo de acción de inicio rápido de la eficacia antidepresiva. El estudio apoya la eficacia y la seguridad del aerosol nasal de esketamina como antidepresivo de acción rápida para pacientes con depresión resistente al tratamiento.

(*Am J Psychiatry* 2019; 176:428–438)

# Tratamiento con cariprazina de la depresión bipolar: Un estudio de fase 3 aleatorizado, doble ciego, controlado con placebo

Willie Earley, M.D., Maria Victoria Burgess, M.D., Ludmyla Rekada, Ph.D., Regan Dickinson, M.A., Balázs Szatmári, Ph.D., György Németh, M.D., Ph.D., Roger S. McIntyre, M.D., F.R.C.P.C., Gary S. Sachs, M.D., Lakshmi N. Yatham, M.B.B.S., F.R.C.P.C.

**Objetivo:** En un estudio previo de fase 2, se encontró que la cariprazina, un agonista parcial de los receptores 5-HT<sub>1A</sub> y D<sub>3</sub>/D<sub>2</sub> de dopamina, es efectiva para el tratamiento de la depresión bipolar I. En este estudio de fase 3 se continúa estudiando la eficacia, la seguridad y la tolerabilidad de la cariprazina en la depresión bipolar I.

**Método:** En un estudio doble ciego y controlado con placebo, participantes adultos que cumplían los criterios del DSM-5 para trastorno bipolar I y con un episodio depresivo en curso fueron asignados aleatoriamente para recibir placebo (N=158) o cariprazina en dosis de 1,5 mg/día (N=157) o 3,0 mg/día (N=165). Los parámetros de eficacia primarios y secundarios fueron, respectivamente, los cambios desde el inicio hasta la semana 6 en la puntuación en la Escala de Evaluación de la Depresión de Montgomery-Åsberg (MADRS) y la puntuación en la Escala de Impresiones Clínicas Globales para severidad (CGI-S). Se estimaron las diferencias de medias de mínimos cuadrados utilizando un modelo mixto para medidas repetidas, y se ajustaron los valores p para multiplicidad.

**Resultados:** Ambas dosis de cariprazina fueron significativamente más efectivas que el placebo para mejorar los sínto-

mas depresivos ( al reducir la puntuación total en la escala MADRAS); las diferencias de medias de mínimos cuadrados fueron -2,5 (IC 95%=-4,6 a -0,4) para la cariprazina en 1,5 mg/día y -3,0 (IC 95%=-5,1 a -0,9) para la cariprazina en 3,0 mg/día. Ambas dosis de cariprazina se asociaron a puntuaciones inferiores en la escala CGI-S en comparación con el placebo, pero las diferencias no alcanzaron significancia estadística después de los ajustes para multiplicidad (diferencia de las medias de los mínimos cuadrados, -0,2 [IC 95%=-0,5 a 0,0] para el grupo de 1,5 mg/día y -0,3 [IC 95%=-0,5 a 0,0] para el grupo de 3,0 mg/día). Los eventos adversos comunes emergentes del tratamiento (como mínimo en 5% de los participantes en cualquiera de los grupos de cariprazina y el doble que en el grupo de placebo) fueron náuseas, acatisia, mareo y sedación. Los cambios de las medias de peso y parámetros metabólicos fueron relativamente pequeños y comparables entre los grupos.

**Conclusiones:** La cariprazina, en dosis tanto de 1,5 mg/día como de 3,0 mg/día, fue efectiva, en general bien tolerada y relativamente segura para reducir los síntomas antidepresivos en adultos con depresión bipolar I.

(*Am J Psychiatry* 2019; 176:439-448)

## Olanzapina versus placebo en pacientes adultos ambulatorios con anorexia nerviosa: Un ensayo clínico aleatorizado

Evelyn Attia, M.D., Joanna E. Steinglass, M.D., B. Timothy Walsh, M.D., Yuanjia Wang, Ph.D., Peng Wu, M.S., Colleen Schreyer, Ph.D., Jennifer Wildes, Ph.D., Zeynep Yilmaz, Ph.D., Angela S. Guarda, M.D., Allan S. Kaplan, M.D., Marsha D. Marcus, Ph.D.

**Objetivo:** Este estudio evaluó los beneficios de la olanzapina en comparación con el placebo para pacientes adultos ambulatorios con anorexia nerviosa.

**Método:** Este ensayo aleatorizado, doble ciego y controlado con placebo, de pacientes adultos ambulatorios con anorexia nerviosa (N=152, 96% de los cuales eran mujeres; la media del índice de masa corporal [IMC] de la muestra era 16,7) se realizó en cinco sedes en Norteamérica. Los participantes fueron asignados aleatoriamente en un ratio 1:1 para recibir olanzapina o placebo y se les controló semanalmente por 16 semanas. Las medidas de resultado primarias fueron el índice de cambio del peso corporal y el índice de cambio de la obsesividad, evaluada con la Escala Obsesivo-Compulsiva de Yale-Brown (YBOCS).

**Resultados:** Setenta y cinco participantes fueron asignados para recibir olanzapina y 77 para recibir placebo. Se observó una interacción tiempo-tratamiento estadísticamente significativa, lo que indicaba que el aumento IMC a lo largo del

tiempo fue mayor en el grupo de olanzapina (0,259 [DE=0,051] en comparación con 0,095 [DE=0,053] por mes). No hubo diferencias significativas entre los grupos de tratamiento en el cambio en la puntuación de la subescala de obsesiones YBOCS a lo largo del tiempo (-0,325 en comparación con -0,017 puntos por mes) ni hubo diferencias significativas entre los grupos en la frecuencia de las anomalías en los exámenes de sangre que evaluaban las potenciales alteraciones metabólicas.

**Conclusiones:** El estudio documentó un efecto terapéutico modesto de la olanzapina en comparación con el placebo en el peso de pacientes adultos ambulatorios con anorexia nerviosa, pero ningún beneficio significativo de los síntomas psicológicos. No obstante, el hallazgo sobre el peso es notable, puesto que lograr cambio en el peso es un gran desafío en este trastorno.

(*Am J Psychiatry* 2019; 176:449–456)

## Mitigación del aumento de peso inducido por la olanzapina con samidorfan, un antagonista opioide: Un estudio de fase 2 aleatorizado y doble ciego con pacientes con esquizofrenia

William F. Martin, Ph.D., Christoph U. Correll, M.D., Peter J. Weiden, M.D., Ying Jiang, Ph.D., Sanjeev Pathak, M.D., Lauren DiPetrillo, Ph.D., Bernard L. Silverman, M.D., Elliot W. Ehrich, M.D.

**Objetivo:** Evidencia pre-clínica y datos de un estudio de prueba de concepto en voluntarios sanos sugieren que el samidorfan, un antagonista opioide, mitiga el aumento de peso asociado a la olanzapina. Este estudio comparó prospectivamente la terapia de combinación de olanzapina más samidorfan o placebo para el tratamiento de la esquizofrenia.

**Método:** Este fue un estudio de fase 2, aleatorizado, multicéntrico e internacional, de olanzapina más samidorfan en pacientes con esquizofrenia. El estudio tuvo un período introductorio de 1 semana con olanzapina administrada abiertamente, seguido de una fase de 12 semanas de tratamiento doble ciego en la que los pacientes fueron asignados aleatoriamente, en un ratio 1:1:1:1, para recibir olanzapina más placebo (N=75) u olanzapina más 5 mg (N=80), 10 mg (N=86), o 20 mg (N=68) de samidorfan. Los objetivos primordiales eran confirmar que la eficacia antipsicótica de la olanzapina más samidorfan era comparable a la de la olanzapina más placebo, evaluar el efecto de combinar olanzapina con samidorfan en el aumento de peso inducido por la olanzapina, y evaluar la seguridad y la tolerabilidad en general de la olanzapina más samidorfan.

**Resultados:** La eficacia antipsicótica, evaluada con la puntuación total en la Escala para el Síndrome Positivo y Negativo (PANSS), fue equivalente en todos los grupos de tratamiento. El tratamiento con olanzapina más samidorfan

resultó en un aumento de peso significativamente inferior (aumento de peso 37% inferior en comparación con olanzapina más placebo). El porcentaje de cambio de las medias de mínimos cuadrados desde el inicio del estudio en el peso corporal fue 4,1% (2,9 kg) para el grupo de olanzapina más placebo y 2,6% (1,9 kg) para el grupo de olanzapina más samidorfan (2,8% [2,1 kg] para el grupo de 5 mg, 2,1% [1,5 kg] para el grupo de 10 mg y 2,9% [2,2 kg] para el grupo de 20 mg). Los eventos adversos reportados en una frecuencia  $\geq 5\%$  en cualquiera de los grupos de olanzapina más samidorfan y que ocurrieron en una proporción  $\geq 2$  veces mayor que en el grupo de olanzapina más placebo, fueron somnolencia, sedación, mareo y estreñimiento. Las demás medidas de seguridad fueron comparables entre los grupos de olanzapina más samidorfan y el grupo de olanzapina más placebo.

**Conclusiones:** La eficacia antipsicótica de la olanzapina más samidorfan fue equivalente a la de la olanzapina más placebo, y la olanzapina más samidorfan se asoció a una mitigación clínica considerable y estadísticamente significativa del aumento de peso en comparación con la olanzapina más placebo. La combinación de olanzapina más samidorfan en general fue bien tolerada, con un perfil de seguridad similar al de la olanzapina más placebo.

(*Am J Psychiatry* 2019; 176:457–467)

## Los receptores de nociceptina están hiperregulados en el trastorno por consumo de cocaína: Un estudio de imágenes de tomografía por emisión de positrones utilizando [<sup>11</sup>C]NOP-1A

Rajesh Narendran, M.D., Savannah Tollefson, B.S., Michael L. Himes, B.S., Jennifer Paris, M.Ed., M.S.L., Brian Lopresti, M.S.N.E., Roberto Ciccocioppo, Ph.D., N. Scott Mason, Ph.D.

**Objetivo:** La nociceptina/orfanina FQ (N/OFQ) es un transmisor neuropéptido anti-estrés en el cerebro que contrarresta los síntomas de estrés y ansiedad mediados por el factor liberador de corticotropina (CRF) durante la abstinencia de drogas y alcohol. También inhibe la liberación de numerosos neurotransmisores, incluyendo la dopamina y el glutamato, que le permite bloquear las propiedades «gratificantes» de la cocaína. Se ha demostrado que la administración crónica de cocaína a roedores reduce la N/OFQ y aumenta los receptores de péptidos opioides nociceptivos (NOP) en el núcleo accumbens. Ningún estudio anterior ha reportado el estatus *in vivo* de NOP en humanos que abusan crónicamente de la cocaína.

**Método:** Se utilizó tomografía por emisión de positrones (PET) y [<sup>11</sup>C]NOP-1A para medir la ligazón de NOP *in vivo* en 24 individuos con trastorno por consumo de cocaína y 26 sujetos de control sanos, en pares con igual edad, sexo y estatus de fumador. Los participantes con trastorno por consumo de cocaína sin ningún trastorno comórbido, psiquiátrico o médico, fueron escaneados después de 2 semanas de abstinencia monitoreada mientras eran pacientes ambulatorios. El volumen de distribución ( $V_T$ ) de [<sup>11</sup>C] NOP-1A se midió con análisis cinético utilizando la función arterial de

entrada en regiones cerebrales que median los comportamientos de recompensa y estrés. A los participantes con trastorno por consumo de cocaína se les hizo seguimiento durante 12 semanas después del escaneo PET para documentar la recaída y relacionarla con el  $V_T$ .

**Resultados:** Se observó un aumento significativo del  $V_T$  de [<sup>11</sup>C]NOP-1A en el grupo del trastorno por consumo de cocaína en comparación con el grupo sano de control. Dicho aumento, que fue generalizado en todas las regiones de interés (aproximadamente 10%) fue más prominente en el mesencéfalo, el estrado ventral y el cerebelo. Sin embargo, el  $V_T$  aumentado en estas regiones no predijo la recaída.

**Conclusiones:** El aumento de NOP en el trastorno por consumo de cocaína sugiere una respuesta adaptativa a la reducción de N/OFQ o al aumento de transmisión CRF, o a ambos factores. Futuros estudios deben examinar las interacciones entre el CRF y los NOP para dilucidar su papel en el refuerzo negativo y la recaída. Las medicaciones agonistas de los NOP para mejorar la N/OFQ deben explorarse como terapéutica para tratar el trastorno por consumo de cocaína.

(*Am J Psychiatry* 2019; 176:468–476)

## Variantes farmacogenómicas e interacciones de medicamentos identificadas por medio del análisis genético del metabolismo de la clozapina

Antonio F. Pardiñas, Ph.D., Mariana Nalmpanti, B.Sc., Andrew J. Pocklington, Ph.D., Sophie E. Legge, Ph.D., Christopher Medway, Ph.D., Adrian King, Ph.D., John Jansen, Ph.D., Marinka Helthuis, M.D., Stanley Zammit, M.R.C.Psych., Ph.D., James MacCabe, F.R.C.Psych., Ph.D., Michael J. Owen, F.R.C.Psych., Ph.D., Michael C. O'Donovan, F.R.C.Psych., Ph.D., James T.R. Walters, M.R.C.Psych., Ph.D.

**Objetivo:** La clozapina es el único medicamento efectivo para la esquizofrenia resistente al tratamiento, pero su uso a nivel mundial todavía está limitado por sus complejos protocolos de titulación. Si bien el descubrimiento de variantes farmacogenómicas del metabolismo de la clozapina puede mejorar la gestión clínica, todavía no se han reportado hallazgos robustos. Este estudio es el primero en adoptar el marco de los estudios de asociación del genoma completo (GWAS) para descubrir marcadores genéticos de concentraciones de plasma de la clozapina en una muestra grande de pacientes con esquizofrenia resistente al tratamiento.

**Método:** Los autores utilizaron regresión de modelos mixtos para combinar datos de múltiples ensayos de concentraciones de plasma de metabolitos de la clozapina de un servicio de monitoreo de clozapina y se realizó un análisis del genoma completo de clozapina, norclozapina, y su radio en 10.353 ensayos de 2.989 individuos. Estos análisis se ajustaron para factores demográficos que se sabe que influyen en el metabolismo de la clozapina, aunque no fue posible ajustar todos los potenciales mediadores por motivo de la naturaleza de los datos disponibles. Los resultados de los GWAS se utilizaron para localizar enzimas específicas y vías y compuestos metabólicos que pudieran interactuar con la farmacocinética de la clozapina.

**Resultados:** Los autores identificaron cuatro sitios (*loci*) distintos, significativos del genoma completo que albergan variantes comunes que afectan el metabolismo de la clozapina o sus metabolitos. La evaluación detallada indicó variantes de codificación y regulatorias en varios genes CYP\* y UGT\* y reveló evidencia corroborativa de las interacciones entre el metabolismo de la clozapina, el café y el tabaco. Los efectos individuales de polimorfismos de nucleótido simple (SNPs) identificados de manera detallada a partir de estos *loci* fueron grandes, como el alelo menor de rs2472297, que se asoció a una reducción de las concentraciones de clozapina aproximadamente equivalentes a una reducción de 50 mg/día de la dosis de clozapina. Por sí mismos, estos SNPs solos explicaron del 1,15% al 9,48% de la varianza en los datos de concentración de plasma.

**Conclusiones:** Existen variantes genéticas con grandes efectos en el metabolismo de la clozapina y se pueden encontrar por medio de enfoques del genoma completo. Su identificación abre el camino para estudios clínicos que evalúen el uso de la farmacogenómica en la gestión clínica de pacientes con esquizofrenia resistente al tratamiento.

(*Am J Psychiatry* 2019; 176:477–486)
